# Supplementary material for: Assessing the feasibility of using a neural network to filter Orbiting Carbon Observatory 2 (OCO-2) retrievals at northern high latitudes
Source: Copernicus journal article supplement (doi:10.5194/amt-14-7511-2021), 2021-12-03
Supplement: Supplementary file 1 [file amt-14-7511-2021-supplement.zip]

Archive with 2 entries (2 files):
- amt-14-7511-2021-supplement-title-page.pdf
- nn_weights_standardization.xlsx
