# Supplementary material for: Assessing the feasibility of using a neural network to filter Orbiting Carbon Observatory 2 (OCO-2) retrievals at northern high latitudes
Source: Copernicus journal article supplement (doi:10.5194/amt-14-7511-2021), 2021-12-03
Supplement: Supplementary file 1 [file amt-14-7511-2021-supplement.zip › amt-14-7511-2021-supplement-title-page.pdf]

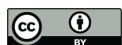

*Supplement of*

**Assessing the feasibility of using a neural network to filter Orbiting Carbon Observatory 2 (OCO-2) retrievals at northern high latitudes**

**Joseph Mendonca et al.**

*Correspondence to:* Joseph Mendonca ([joe.mendonca@canada.ca](mailto:joe.mendonca@canada.ca))

- [amt-14-7511-2021-supplement-title-page.pdf](#)
- [nn\\_weights\\_standardization.xlsx](#)

The copyright of individual parts of the supplement might differ from the article licence.
